# Supplementary material for: A dual-confined lithium nucleation and growth design enables dendrite-free lithium metal batteries
Source: Royal Society of Chemistry journal article supplement (doi:10.1039/d2ta01536f), 2022-01-01
Supplement: d2ta01536f1.pdf [file d2ta01536f1.pdf]

## Supporting Information

### **A Dual-confined Lithium Nucleation and Growth Design Enables Dendrite-free Lithium Metal Battery**

Lun Li, ‡ Huaqiang Fu, ‡ Jinlong Yang,\* Pengyan Wang, Huazhang Zhang, Xin Zhao, Zhitong Xiao, Zhenhui Liu, Zongkui Kou, Zhenbo Wang, Daping He\*

## **1 Experimental details**

Firstly, a homogeneous solution was obtained by mixing GO ( $15 \text{ mg mL}^{-1}$ ) and  $600 \text{ mg AgNO}_3$ . The resultant solution was subsequently blade casted and dried at  $60 \text{ }^\circ\text{C}$  for  $12 \text{ h}$ . Subsequently, soaking the film in the  $0.1 \text{ M L}^{-1}$  vitamin C (VC) solution under water bath with a temperature of  $80 \text{ }^\circ\text{C}$  for  $2 \text{ h}$ . Finally, the GO/ $\text{AgNO}_3$  film was calcined at  $600 \text{ }^\circ\text{C}$  for  $1 \text{ h}$  with a heating rate of  $5 \text{ }^\circ\text{C min}^{-1}$  under an argon flow to obtain the Ag/N-rGO film. rGO film was also synthesized by a similar procedure without the addition of  $\text{AgNO}_3$ .

## **2 Materials Characterization**

The crystal phases were identified by X-ray diffraction (XRD) on a D8 Advance X-ray diffractometer with a non-monochromatic  $\text{Cu K}\alpha$  X-ray radiation. The morphologies were investigated by field-emission scanning electron microscopy (FESEM) on a JEOL-7100F microscope with  $20 \text{ kV}$  acceleration voltage. Transmission electron microscopy (TEM) and high-resolution TEM (HRTEM) were carried out using a JEM-2100F microscope. Elemental mappings were collected with an EDX-GENESIS 60S spectrometer. Raman spectra were measured using a Renishaw RM-1000 micro-Raman spectroscopy system. X-ray photoelectron spectroscopy (XPS) was obtained by the VG MultiLab 2000 instrument. TGA was performed using an STA-449C thermobalance and the samples were heated from room temperature to  $800 \text{ }^\circ\text{C}$  in air with a heating rate of  $5 \text{ }^\circ\text{C min}^{-1}$ .

## **3 Electrochemical Measurements**

The electrochemical properties were tested using the CR2025-type coin cells assembled in a glovebox filled with pure argon. A Celgard 2400 microporous membrane was used as separator. 1.0 M LiTFSI in a liquid mixture of 1, 2-dimethoxyethane and 1, 3-dioxolane (1:1 in volume) with 1 wt% LiNO<sub>3</sub> additive was taken as the electrolyte. 35  $\mu$ L electrolyte was added in each cell. For the CE and Li deposition behavior, the Ag/N-rGO, rGO and Cu foil was used as the working electrode and a Li metal was used as counter electrode. For the long-term cycling behavior and rate capability, the symmetric cell was assembled using Li@Ag/N-rGO, Li@rGO and Li@Cu as the electrode for both sides. The Li@Ag/N-rGO, Li@rGO and Li@Cu electrodes were electrochemically deposited with a Li capacity of 3 mAh cm<sup>-2</sup> at 1mA cm<sup>-2</sup>. The full cells were tested at voltage range of 2.3-4.0 V. Metallic Li is electrochemically deposited onto the Ag/N-rGO substrates with a capacity of 3 mAh cm<sup>-2</sup> at 1mA cm<sup>-2</sup> to serve as the anode of full cells. The cathode was prepared by LFP, acetylene black, and polyvinylidene fluoride with the LFP mass ratio of 91.5% mixed in N-methyl-2-pyrrolidone to form a homogeneous slurry. The slurry was then coated onto Al foil and dried at 70 °C for 12 h. The mass loading of LFP electrode is 1.5-2.0 mg cm<sup>-2</sup>. All the electrochemical tests were carried out with a multichannel battery testing system (LAND CT2001A). The electrochemical impedance spectra (EIS) were collected with an Autolab potentiostat/galvanostat.

#### **4 Computational details**

**4.1 First Principles Calculations:** Density functional theory (DFT) calculations in this work were carried out using the CASTEP program on Materials Studio. The exchange-correlation effects were described by the Perdew-Burke-Ernzerhof (PBE) functional within the generalized gradient approximation (GGA) method. The core-valence interactions were accounted by the projected augmented wave (PAW) method. The energy cutoff for plane wave expansions was set to 400 eV, and the 3×3×1 Monkhorst-Pack grid k-points were selected to sample the Brillouin zone integration. The vacuum space is adopted 20 Å above the surfaces to avoid periodic interactions. The structural optimization was completed for energy and force convergence set at  $1.0 \times 10^{-5}$  eV and  $0.03 \text{ eV \AA}^{-1}$ , respectively. Each model was allowed to interact with a Li ion and the binding energy is defined as Equation (1):

$$E_b = E_{\text{total}} - E_{\text{sub}} - E_{\text{Li}}$$

where  $E_{\text{total}}$ ,  $E_{\text{sub}}$ , and  $E_{\text{Li}}$  are the energy of Ag/graphene-based model bound with  $\text{Li}^+$ , Ag/graphene-based model, and  $\text{Li}^+$ , respectively.

**4.2 Modeling for Deposition of Lithium:** The morphology of Li metal growth with  $\text{Li}^+$  concentration distribution and current density distribution at the interface between anode and electrolyte were carried out by COMSOL Multiphysics with a Finite Element Analysis (FEA) model. Periodic conditions are imposed on the left and right boundaries of the model. The simulation cell was 20  $\mu\text{m}$  in diameter and 40  $\mu\text{m}$  in height. The entire simulation process takes 3600 s; aggressive dendrite occurs on the Cu and rGO electrode over time, while the Ag/N-rGO electrode reaches flat and smooth after 50

s. The current density is  $1 \text{ mA cm}^{-2}$ , which is consistent with experimental Settings. The Li nucleus on bare Cu surface and rGO surface is composed of irregular Li peaks, while the Ag/N-rGO surface is presented with uniformly distributed semicircular Li nucleus. These two models are both establish as an ideal model and reflect the real condition to the maximum extent.

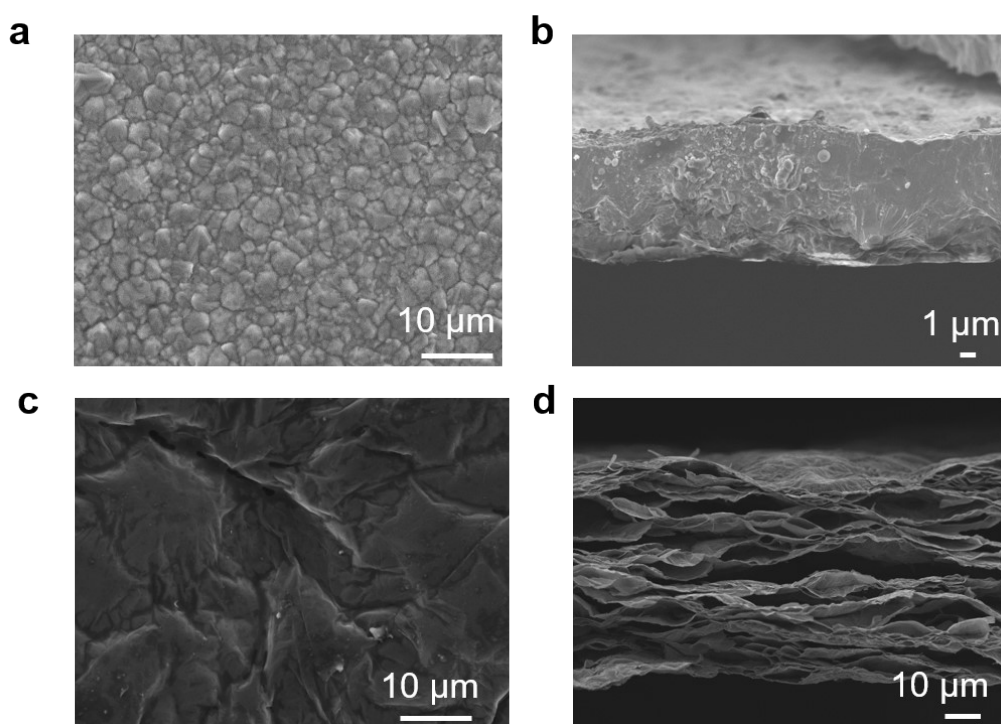

**Fig. S1 Morphology characterization of bare Cu and rGO.** Top view of (a) Cu, (c) rGO film. Cross-sectional view of (b) Cu, (d) rGO film.

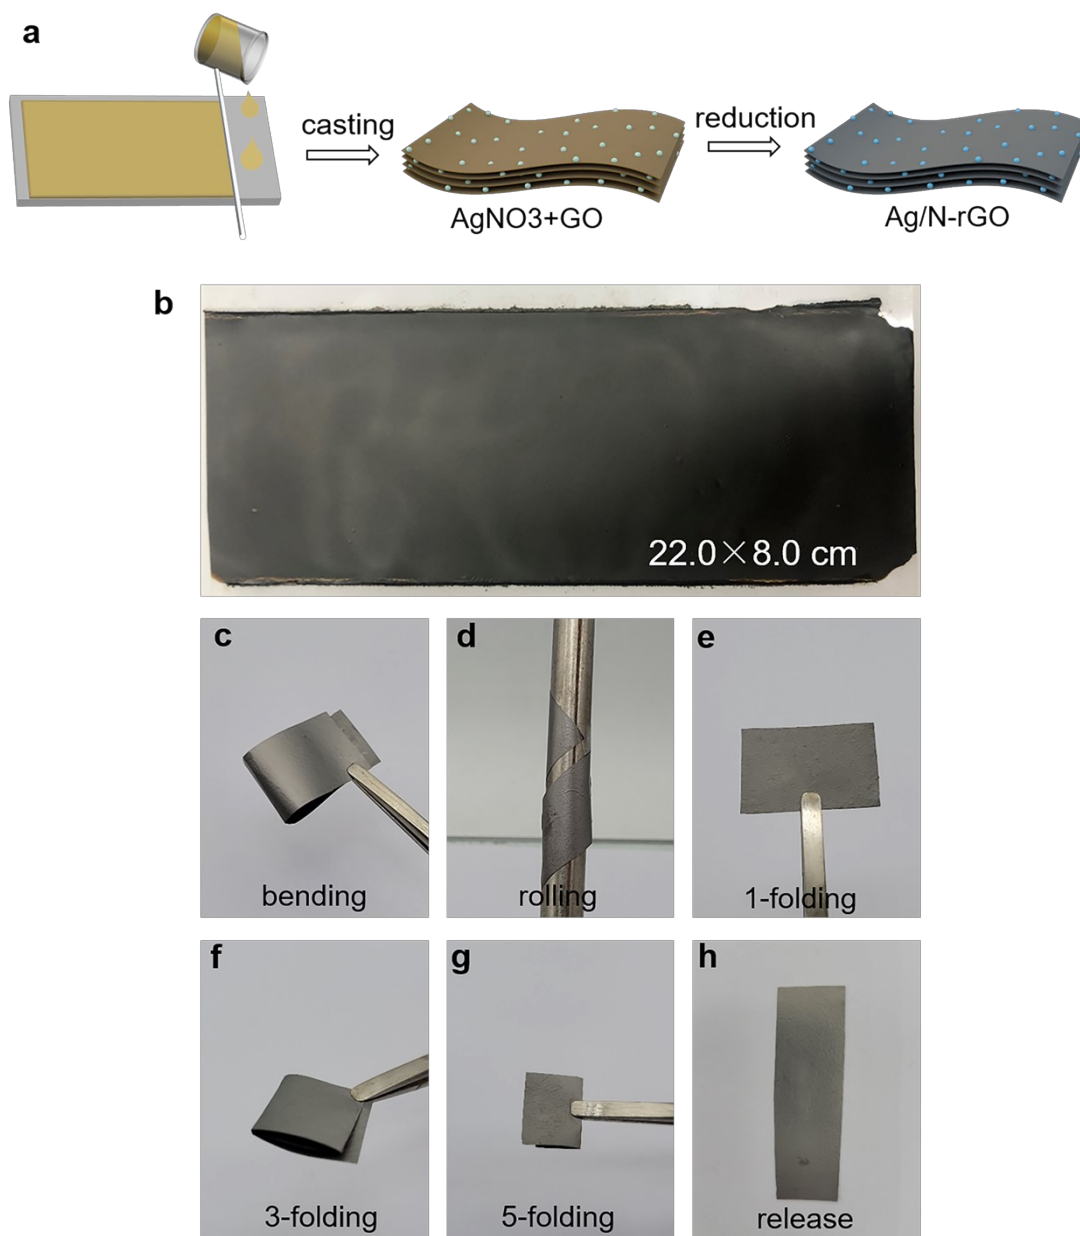

**Fig. S2 Fabrication and digital photos for the appearance and flexibility of the precursor and Ag/N-rGO.** (a) The synthesis procedures of Ag/N-rGO film. (b) A GO/AgNO<sub>3</sub> composite film (22.0×8.0 cm<sup>2</sup>). (c-h) Ag/N-rGO illustrating the flexibility of (c) bending, (d) rolling, (e) 1-folding, (f) 3-folding and (g) 5-folding, and (h) release.

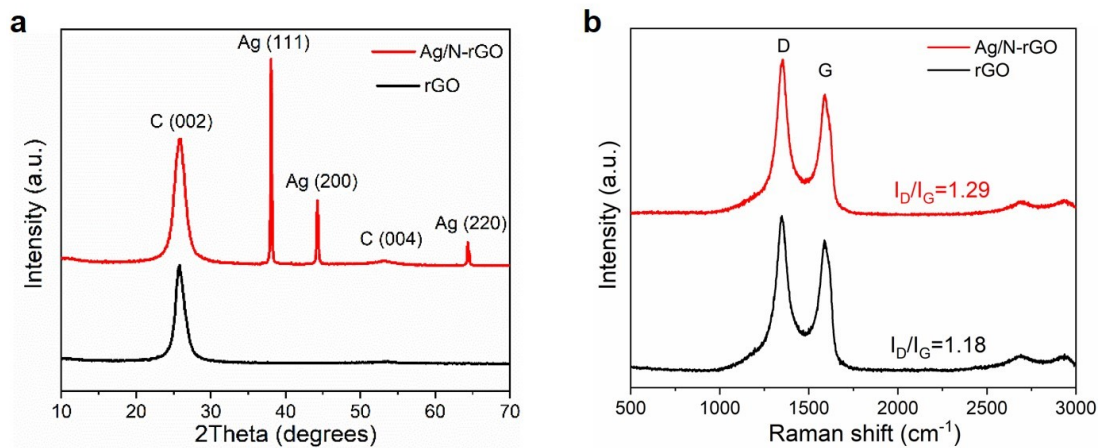

**Fig. S3 Characterization of Ag/N-rGO substrate.** (a) XRD patterns and (b) Raman spectra of Ag/N-rGO (red) and rGO (black).

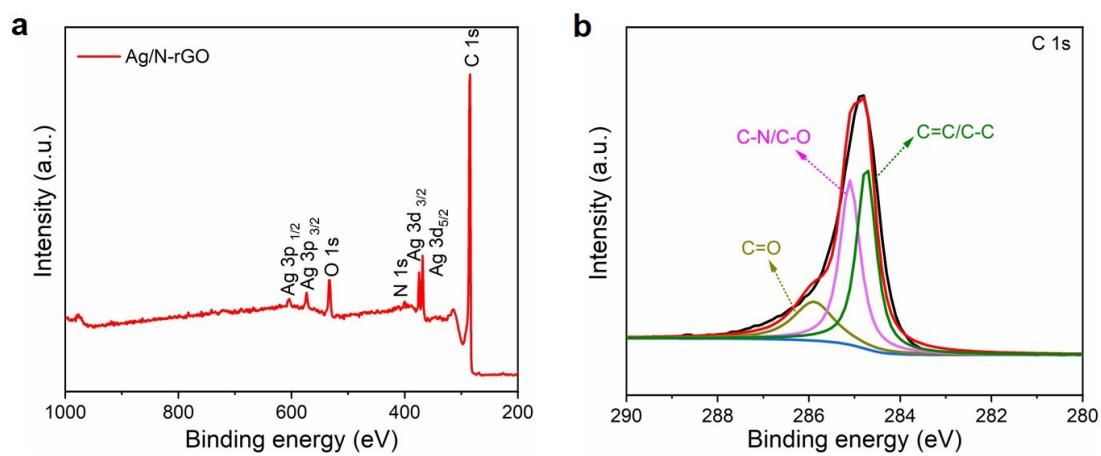

**Fig. S4 Characterization of Ag/N-rGO.** (a) XPS full spectra of Ag/N-rGO. (b) XPS spectra of C 1s of Ag/N-rGO.

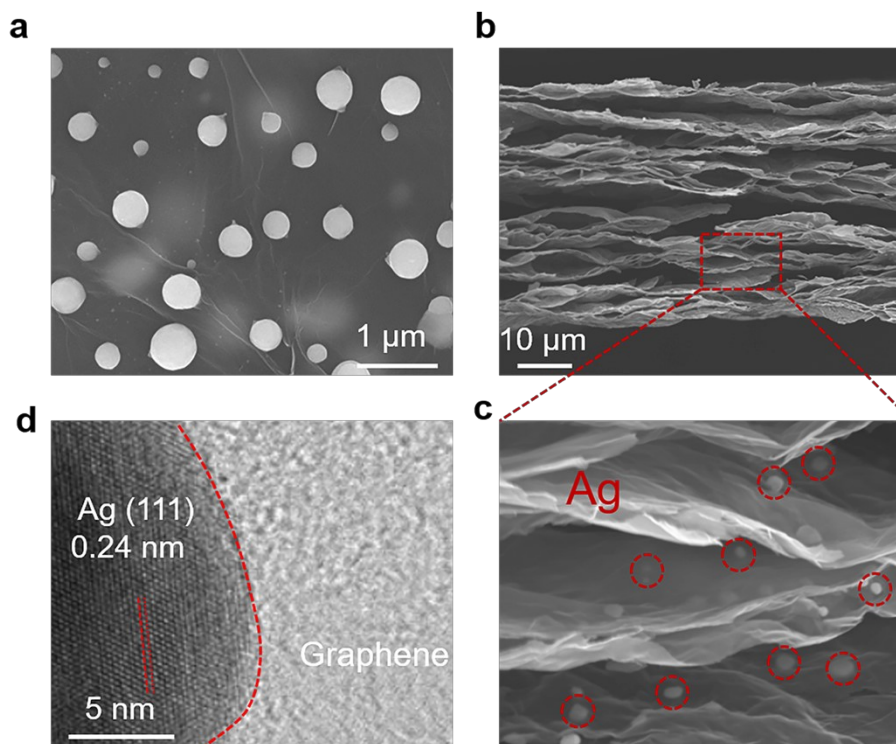

**Fig. S5 Characterization of Ag/N-rGO substrate.** (a) Top-view and (b-c) sectional-view SEM images of Ag/N-rGO. (d) High-resolution TEM image of Ag/N-rGO sheets.

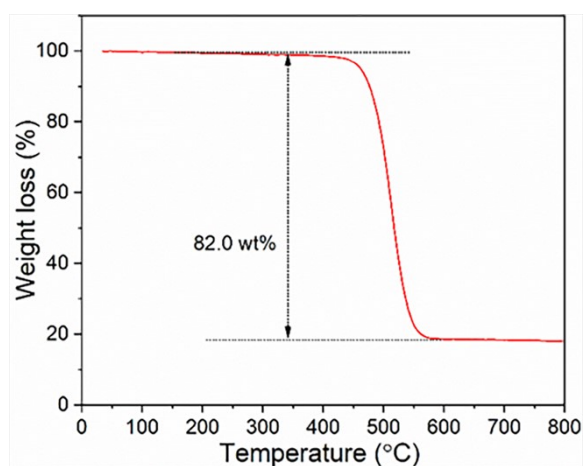

**Fig. S6 Characterization of Ag/N-rGO.** Thermogravimetric analysis of Ag/N-rGO in air at a heating rate of 5 °C min<sup>-1</sup>.



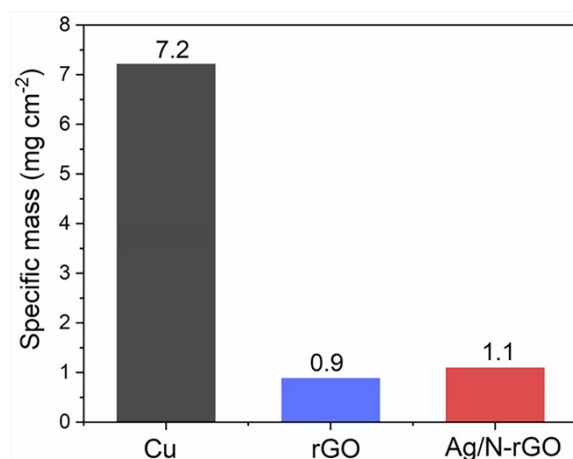

**Fig. S7 Characterization of Cu, rGO and Ag/N-rGO.** Specific mass of Cu, rGO and Ag/N-rGO film.

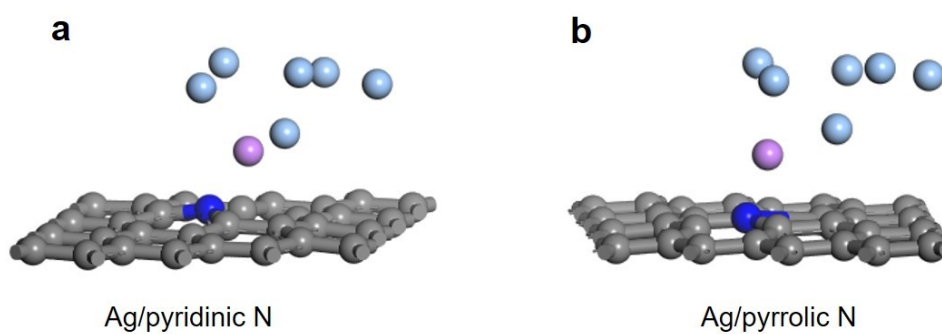

**Fig. S8 DFT calculations.** Optimized structure modeling of Li atom deposited on (a) Ag/pyridinic N-rGO and (b) Ag/pyrrolic N-rGO.

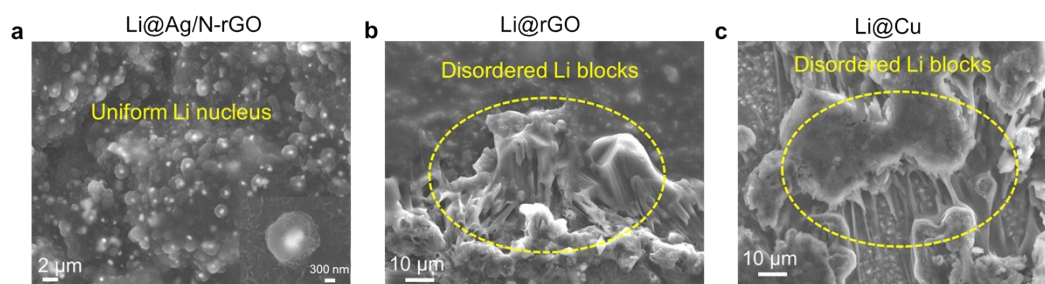

**Fig. S9 Li nucleation morphology.** SEM images of initial Li nucleates on the Cu, rGO and Ag/N-rGO substrate at current density of  $1 \text{ mA cm}^{-2}$  with deposition capacity of  $0.2 \text{ mAh cm}^{-2}$ .

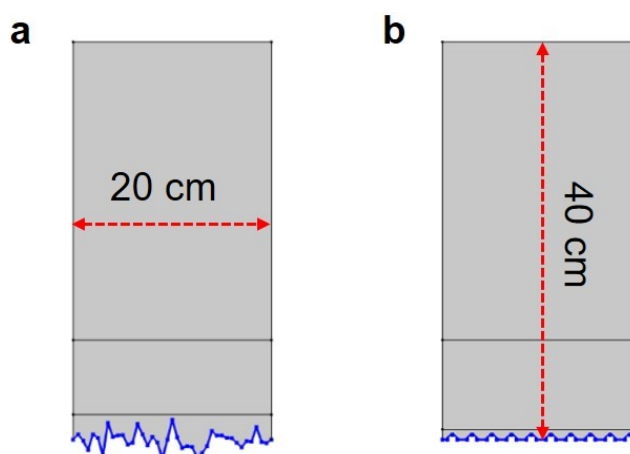

**Fig. S10 COMSOL simulation details.** Simulation cell geometry of initial nucleation in COMSOL for (a) Cu and rGO electrode and (b) Ag/N-rGO electrode.

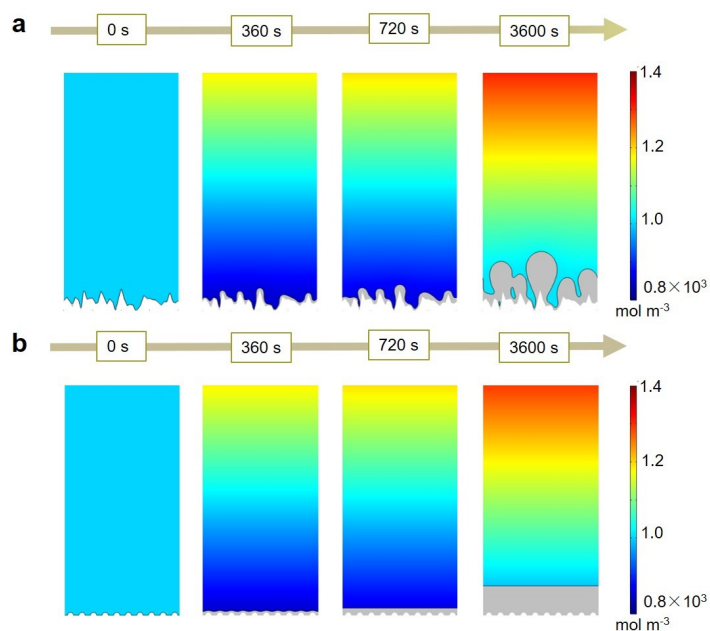

**Fig. S11 COMSOL simulation results.**  $\text{Li}^+$  concentration distributions morphologies with evolution mechanism of Li metal growth under (a) randomly distributed nucleation (Cu, rGO) and (b) uniformly distributed nucleation (Ag/N-rGO).

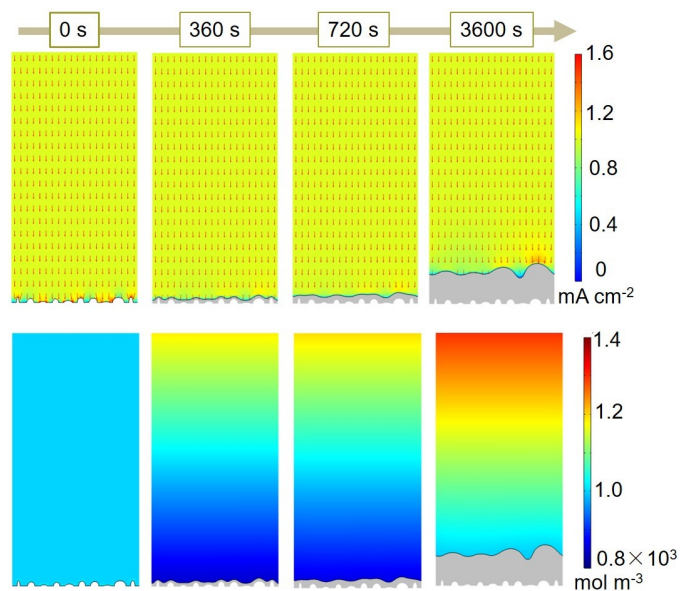

**Fig. S12 COMSOL simulation results.** (a) Current density distributions and (b)  $\text{Li}^+$  concentration distributions with Li deposition morphologies evolution on N-rGO substrate.

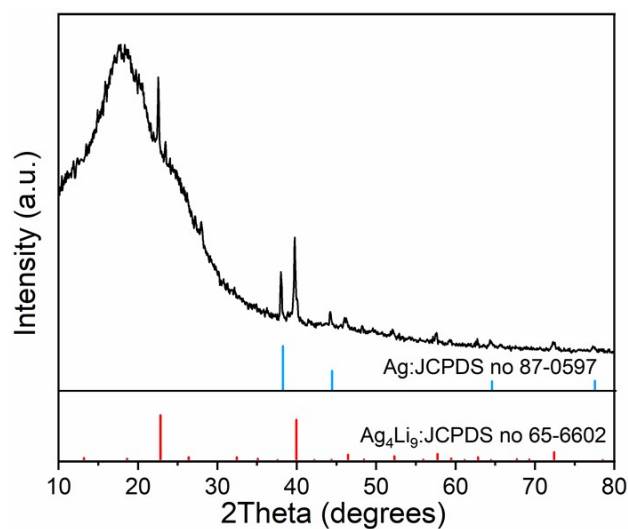

**Fig. S13 Characterization of Li@Ag/N-rGO.** XRD patterns of deposited Li on **Ag/N-rGO** substrate at  $1 \text{ mA cm}^{-2}$  with deposition capacity of  $1 \text{ mAh cm}^{-2}$ .

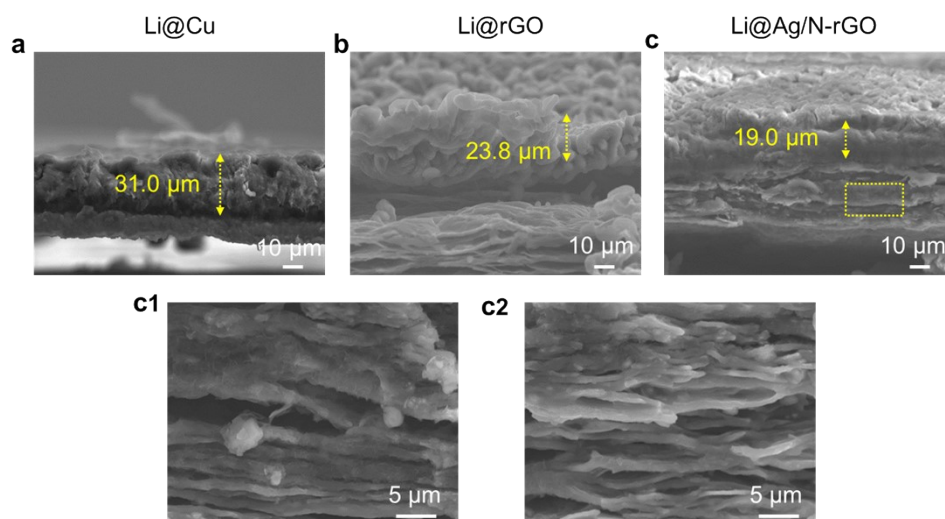

**Fig. S14 Morphology of Li deposition.** Cross-sectional SEM images of the Li deposition behavior on (a) Cu, (b) rGO, and (c) Ag/N-rGO substrate with a capacity of  $4 \text{ mAh cm}^{-2}$  at the current density of  $1 \text{ mA cm}^{-2}$ . (c1, c2) The enlarged cross-sectional observation of Ag/N-rGO.

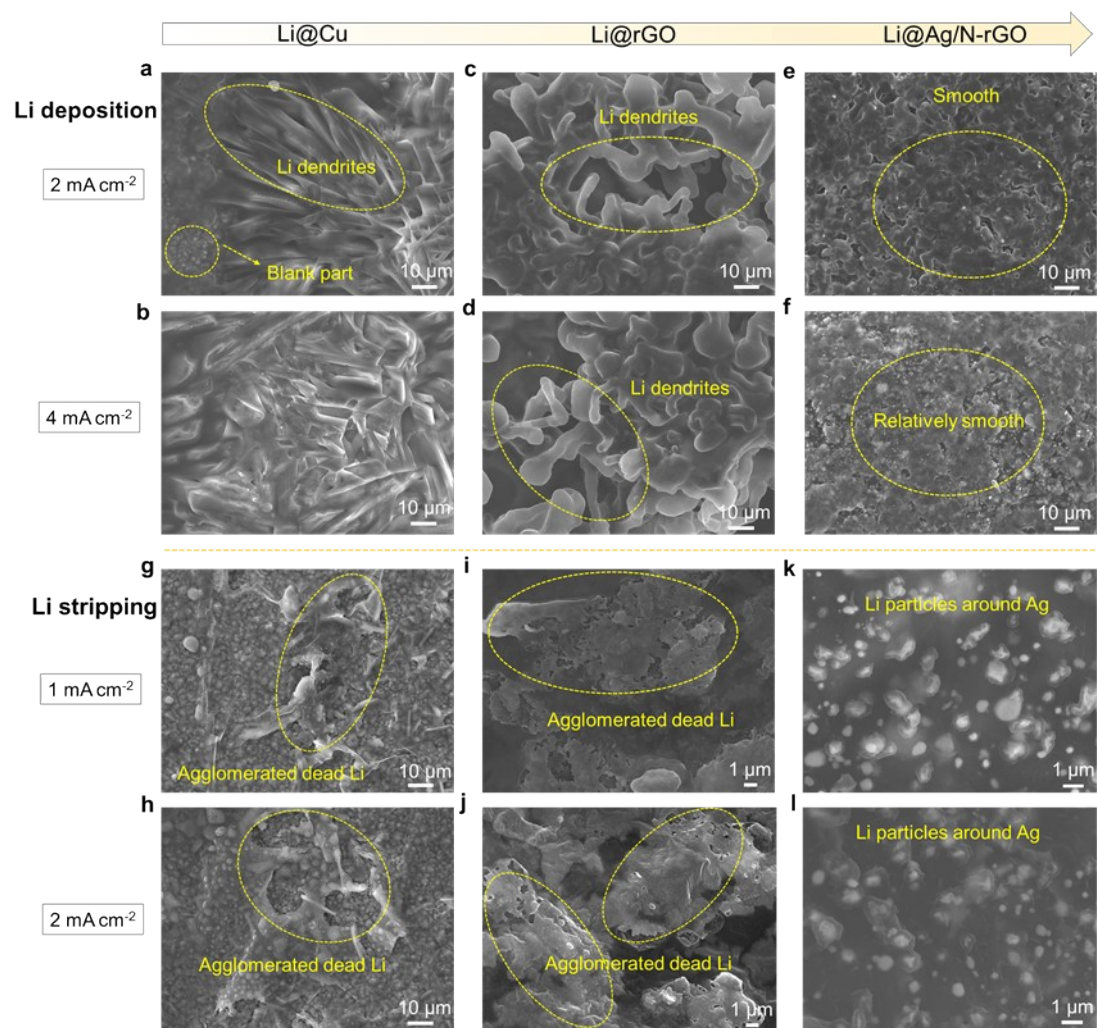

**Fig. S15 Morphology of Li deposition/stripping behaviors at different current densities.** SEM images of the Li deposition behavior at 2 and 4 mA cm<sup>-2</sup> on (a, b) Cu, (c, d) rGO, and (e, f) Ag/N-rGO substrate with a capacity of 2 mAh cm<sup>-2</sup>. SEM images of the Li stripping behaviors at 1 and 2 mA cm<sup>-2</sup> on (g, h) Cu, (i, j) rGO, and (k, l) Ag/N-rGO substrate with a capacity of 1 mAh cm<sup>-2</sup>.

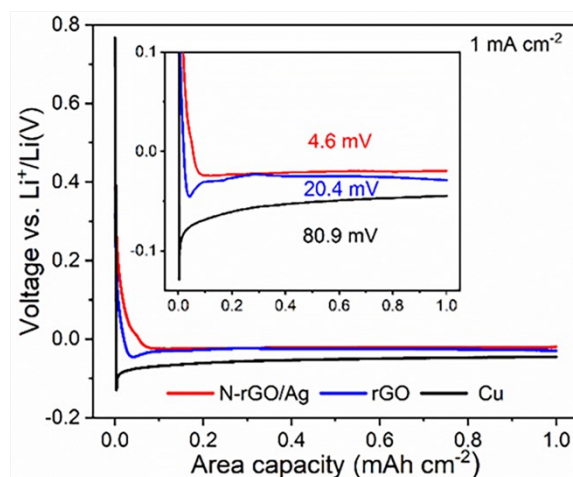

**Fig. S16** Li deposition behavior of the Cu, rGO and Ag/N-rGO substrate. Voltage-capacity profiles of Li deposition for comparison of the nucleation overpotential at 1 mA cm<sup>-2</sup>/1 mAh cm<sup>-2</sup>.

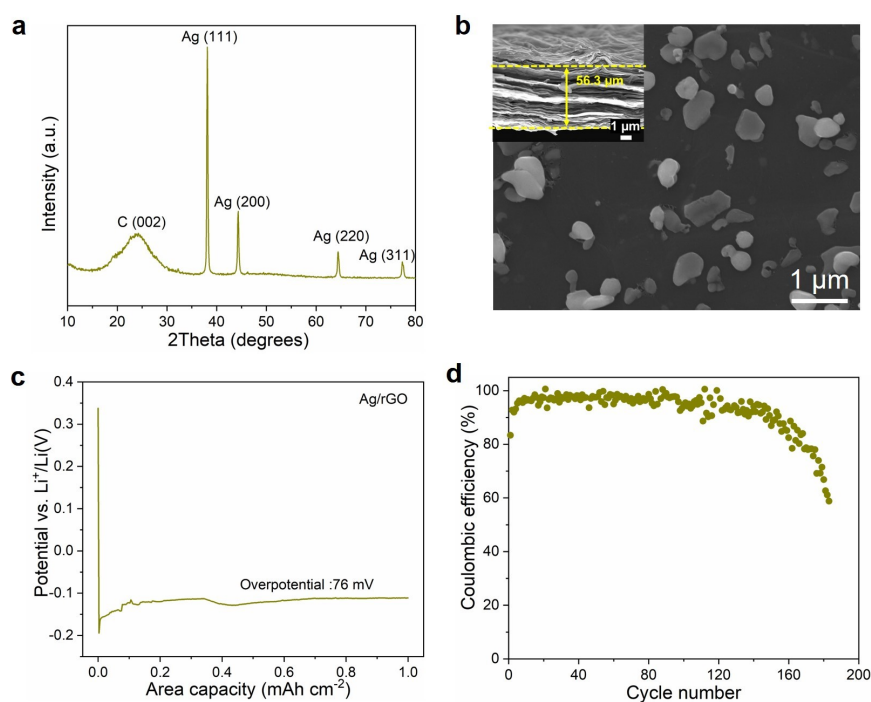

**Fig. S17** Characterization and electrochemical performance of the Ag/rGO samples. (a) XRD patterns, (b) SEM images, (c) overpotential, and (d) CE of Ag/rGO electrode.

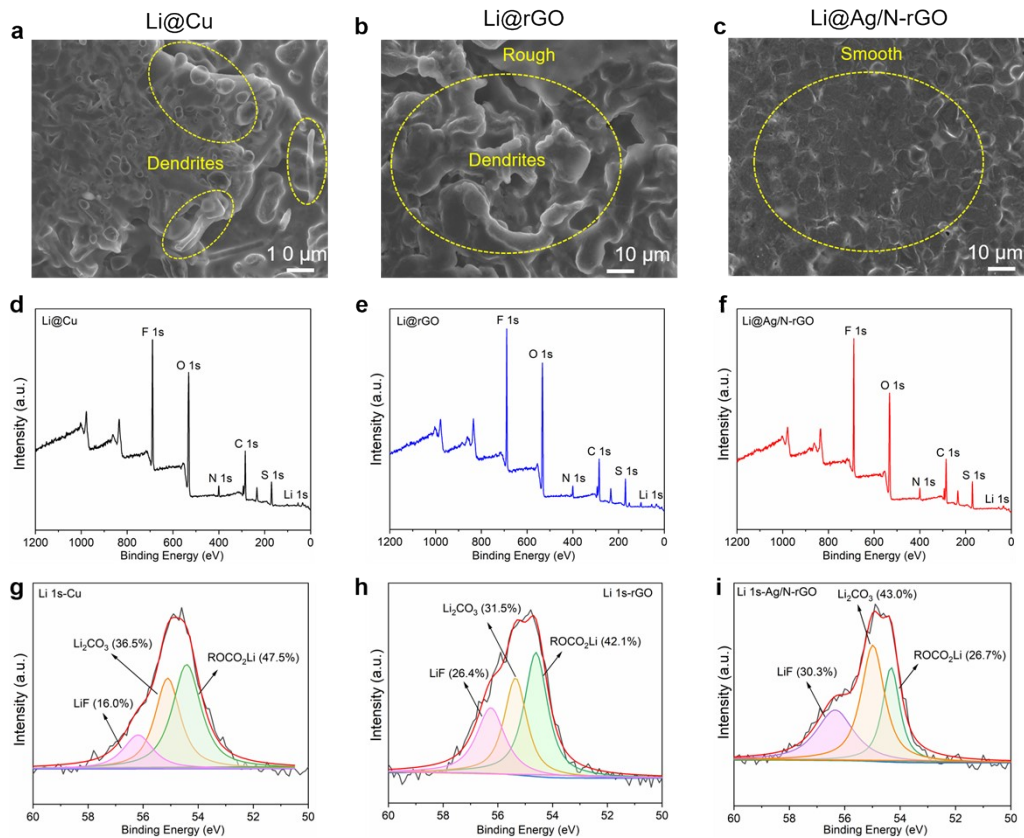

**Fig. S18 Morphology and composition of cycled anode in full batteries.** SEM images of the cycled Li anode on (a) Cu, (b) rGO, and (c) Ag/N-rGO substrate with a capacity of 3 mAh cm<sup>-2</sup> at current density of 1 mA cm<sup>-2</sup>. XPS full spectrum of (d) Cu, (e) rGO, and (f) Ag/N-rGO and Li 1s XPS spectra of (g) Cu, (h) rGO, and (i) Ag/N-rGO electrode in full cells after 40 cycles.

**Table S1** Element contents of Ag/N-rGO.

| Element | Atomic conc. (%) | Mass conc. (%) |
|---------|------------------|----------------|
| Ag      | 1.9              | 14.8           |
| C       | 86.6             | 73.1           |
| O       | 5.6              | 6.3            |
| N       | 5.8              | 5.7            |

**Table S2** Comparison of cycling performance of Li@Ag/N-rGO symmetric cells in this work with a variety of previous reports.

| Anode                                       | Overpotential (mV) | Plating capacity (mAh cm <sup>-2</sup> ) | Life span (h) | Reference |
|---------------------------------------------|--------------------|------------------------------------------|---------------|-----------|
| Ag@CMFs-Li                                  | 49                 | 1                                        | 1000          | [34]      |
| Li-AgNP/CNF                                 | 25                 | 1                                        | 500           | [32]      |
| Li-Co@N-rGO                                 | 10                 | 1                                        | 1000          | [25]      |
| Li-rGO                                      | ~                  | 1                                        | 222           | [18]      |
| N-rGO                                       | 22                 | 0.042                                    | <20           | [30]      |
| N,S-CDs                                     | 63                 | 1                                        | 1200          | [24]      |
| Mg <sub>x</sub> Li <sub>y</sub> /LiF-Li-rGO | <40                | 1                                        | 450           | [S1]      |
| MXene/rGO-Li                                | 36                 | 1                                        | 500           | [36]      |
| 3D Graphene                                 | ~                  | 1                                        | 1000          | [S2]      |
| ZnSAs                                       | 12                 | 1                                        | 800           | [S3]      |
| Li-SirGO                                    | ~                  | 1                                        | ~100          | [S4]      |
| D-Ag@Li                                     | ~                  | 1                                        | >1300         | [11]      |
| Li@CGB                                      | ~                  | 1                                        | 800           | [14]      |
| rGO-Ag-Li                                   | 25                 | 1                                        | 200           | [S5]      |
| Li@Ag/N-rGO                                 | 6.8                | 1                                        | 1200          | This work |



**Other Supplementary Material for this manuscript includes the following [Video S1-S6](#):**

**Video S1** (.mp4 format)  $\text{Li}^+$  concentration distributions with evolution mechanism of Li metal growth under unevenly distributed nucleation (Cu, rGO).

**Video S2** (.mp4 format) Current density distributions with evolution mechanism of Li metal growth under unevenly distributed nucleation (Cu, rGO).

**Video S3** (.mp4 format)  $\text{Li}^+$  concentration distributions with evolution mechanism of Li metal growth under unevenly distributed nucleation (N-rGO).

**Video S4** (.mp4 format) Current density distributions with evolution mechanism of Li metal growth under unevenly distributed nucleation (N-rGO).

**Video S5** (.mp4 format)  $\text{Li}^+$  concentration distributions with evolution mechanism of Li metal growth under uniformly distributed nucleation (Ag/N-rGO).

**Video S6** (.mp4 format) Current density distributions with evolution mechanism of Li metal growth under uniformly distributed nucleation (Ag/N-rGO).

## References

- [S1] Q. Xu, X. Yang, M. Rao, D. Lin, K. Yan, R. A. Du, J. Xu, Y. Zhang, D. Ye, S. Yang, G. Zhou, Y. Lu, Y. Qiu, *Energy Storage Mater.* **2020**, *26*, 73.
- [S2] L. Pan, Z. Luo, Y. Zhang, W. Chen, Z. Zhao, Y. Li, J. Wan, D. Yu, H. He, D. Wang, *ACS Appl. Mater. Interfaces* **2019**, *11*, 44383.
- [S3] K. Xu, M. Zhu, X. Wu, J. Liang, Y. Liu, T. Zhang, Y. Zhu, Y. Qian, *Energy Storage Mater.* **2019**, *23*, 587.
- [S4] H. Wang, X. Cao, H. Gu, Y. Liu, Y. Li, Z. Zhang, W. Huang, H. Wang, J. Wang, W. Xu, J. G. Zhang, Y. Cui, *ACS Nano* **2020**, *14*, 4601.
- [S5] H. Zhuang, P. Zhao, Y. Xu, *Inorg. Chem. Front.* **2020**, *7*, 897.
